# Supplementary material for: Room-temperature phosphorescence probe based on Mn-doped ZnS quantum dots for the sensitive and selective detection of selenite
Source: Royal Society of Chemistry journal article supplement (doi:10.1039/c6ra09702b), 2016-01-01
Supplement: c6ra09702b1.pdf [file c6ra09702b1.pdf]

## Supplementary Materials

### **Room-temperature phosphorescence probe based on Mn-doped ZnS quantum dots for the sensitive and selective detection of selenite**

Jialing Chen<sup>1</sup>, Yaxian Zhu<sup>1</sup>, Yong Zhang<sup>2\*</sup>

<sup>1</sup> Department of Chemistry, College of Chemistry and Chemical Engineering, Key Laboratory of Spectrochemical Analysis & Instrumentation, Ministry of Education, Xiamen University, Xiamen 361005, China

<sup>2</sup> State Key Laboratory of Marine Environmental Science of China (Xiamen University), College of Environment and Ecology, Xiamen University, Xiamen 361102, China

\* Corresponding Author:

Address: State Key Laboratory of Marine Environmental Science of China (*Xiamen University*), College of Environment and Ecology, Xiamen University, 361102 Xiang'an, Xiamen, Fujian Province, China.

Tel.: +86 592-2188685;

Fax: +86 592-2888685.

E-mail address: [yzhang@xmu.edu.cn](mailto:yzhang@xmu.edu.cn)

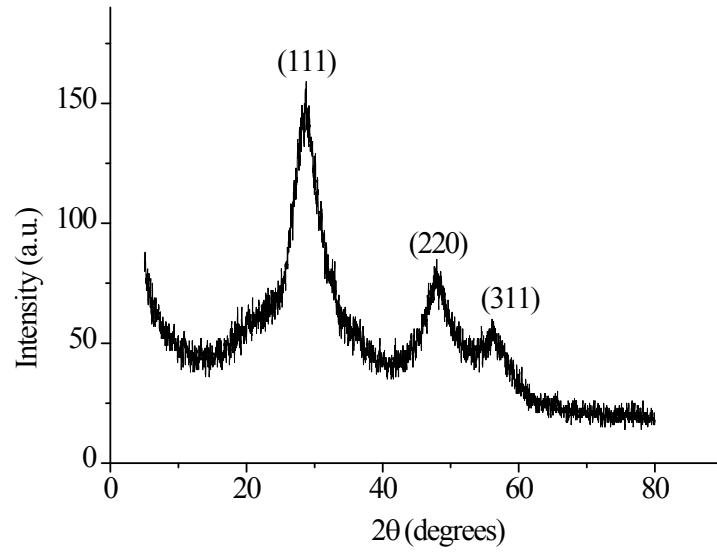

Fig. S1 XRD pattern of Mn-ZnS QDs.

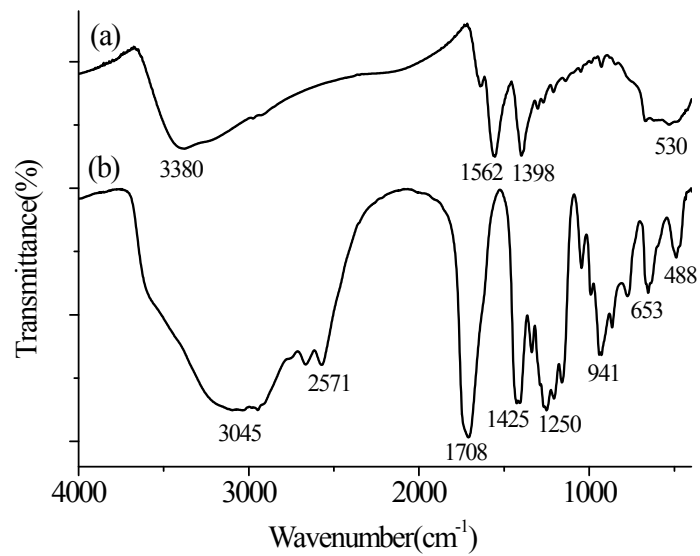

Fig. S2 FTIR spectra of (a) MPA-capped Mn-ZnS QDs and (b) MPA.

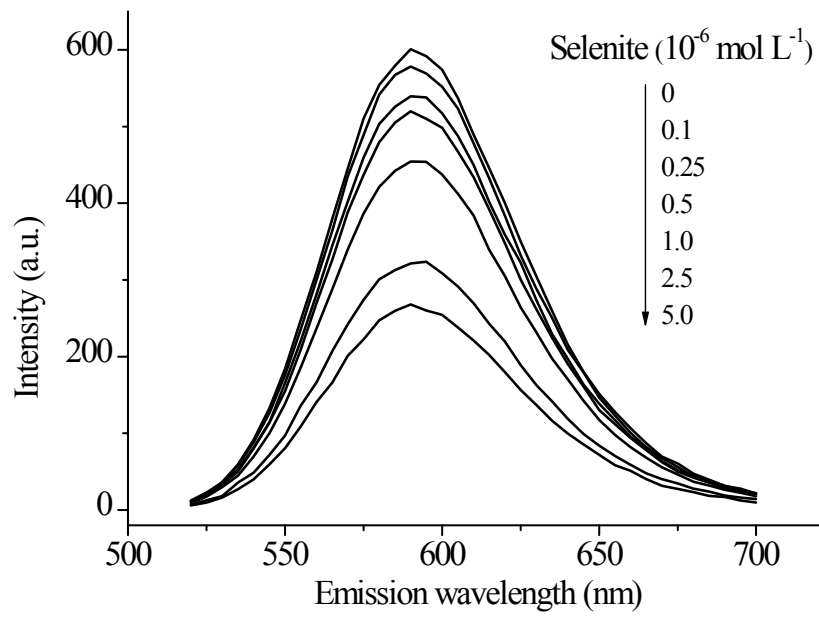

Fig. S3 RTP of Mn-ZnS QDs with GSH in the presence of various concentrations of selenite.
